# Supplementary material for: Heart Failure with Preserved Ejection Fraction: How to Deal with This Chameleon
Source: MDPI journal article supplement (doi:10.3390/jcm13051375), 2024-02-28
Supplement: s1 [file s1]

**Table S1.** RCTs on the use of mineralocorticoid receptor antagonists (MRAs) in HFpEF.

| Trial                                    | Design Study                                                                                  | Patients | Population Characteristics                                                                                                                                                                                                                                                                                                                                                                                                                                                                                                                                                  | LVEF                                   | Groups of Treatment                                                                                                                                                                                                                   | Primary Endpoint (PE)                                     | Results                          |
|------------------------------------------|-----------------------------------------------------------------------------------------------|----------|-----------------------------------------------------------------------------------------------------------------------------------------------------------------------------------------------------------------------------------------------------------------------------------------------------------------------------------------------------------------------------------------------------------------------------------------------------------------------------------------------------------------------------------------------------------------------------|----------------------------------------|---------------------------------------------------------------------------------------------------------------------------------------------------------------------------------------------------------------------------------------|-----------------------------------------------------------|----------------------------------|
| <b><u>RANDOMIZED CLINICAL TRIALS</u></b> |                                                                                               |          |                                                                                                                                                                                                                                                                                                                                                                                                                                                                                                                                                                             |                                        |                                                                                                                                                                                                                                       |                                                           | Adj. Mean Diff; (95% CI)         |
| Aldo-DHF [125]                           | Multicenter, randomized, placebo-controlled, double-blinded trial                             | 422      | • HF NYHA II-III ambulatory                                                                                                                                                                                                                                                                                                                                                                                                                                                                                                                                                 | ≥50%                                   | Spironolactone 25 mg ( <i>n</i> = 213) vs. placebo ( <i>n</i> = 209)                                                                                                                                                                  | Changes at 12 months FU E/e' and VO2 peak                 | -1.5; -2.0-0.9; <i>p</i> < 0.001 |
|                                          |                                                                                               |          |                                                                                                                                                                                                                                                                                                                                                                                                                                                                                                                                                                             |                                        |                                                                                                                                                                                                                                       |                                                           | HR; (95% CI)                     |
| TOPCAT-trial [98]                        | Multicenter, international, randomized, double-blind, placebo-controlled trial                | 3445     | • HF NYHA II-III                                                                                                                                                                                                                                                                                                                                                                                                                                                                                                                                                            | ≥45%                                   |                                                                                                                                                                                                                                       | Composite of CV mortality, aborted cardiac arrest, or HHF | 0.89; 0.77-1.04; <i>p</i> = 0.14 |
| <b><u>ONGOING CLINICAL TRIALS</u></b>    |                                                                                               |          |                                                                                                                                                                                                                                                                                                                                                                                                                                                                                                                                                                             |                                        |                                                                                                                                                                                                                                       |                                                           |                                  |
| FINEARTS-HF (NCT04435626)                | Multicenter, randomized, double-blind, parallel-group, placebo-controlled trial               | 6000     | <ul style="list-style-type: none"> <li>• HF NYHA class II-IV Ambulatory or hospitalized</li> <li>• On diuretics</li> <li>• Structural heart abnormalities: <ul style="list-style-type: none"> <li>○ LAD ≥3.8 cm</li> <li>○ LAA ≥ 20 cm<sup>2</sup></li> <li>○ LAVI &gt;30 mL/m<sup>2</sup></li> <li>○ LVMI ≥115 g/m<sup>2</sup> (σ)/95 g/m<sup>2</sup> (♀)</li> <li>○ Septal thickness or posterior wall thickness ≥1.1 cm</li> </ul> </li> <li>• NT-proBNP ≥300 pg/mL or BNP ≥100 pg/mL in sinus rhythm</li> <li>• NT-proBNP ≥900 pg/mL or BNP ≥300 pg/mL in AF</li> </ul> | ≥40%                                   | Finerenone vs placebo                                                                                                                                                                                                                 | Rate of CV death and HF events (HHF or urgent HF visit)   | Ongoing                          |
| MIRACLE (NCT04595370)                    | Phase-2b, randomized, double-blind, active-controlled, multicenter study                      |          | <ul style="list-style-type: none"> <li>• HF NYHA II-III class</li> <li>• CKD with eGFR 20-60 mL/min/1.73 m<sup>2</sup></li> </ul>                                                                                                                                                                                                                                                                                                                                                                                                                                           | <60%                                   | <ul style="list-style-type: none"> <li>- Balcinrenone Dose A + dapagliflozin 10 mg</li> <li>- Balcinrenone Dose B + dapagliflozin 10 mg</li> <li>- Balcinrenone Dose C + dapagliflozin 10 mg</li> <li>- Dapagliflozin 10 m</li> </ul> | Percent change from baseline in UACR at 12 weeks          | Ongoing                          |
| SPIRIT-HF (NCT04727073)                  | Double-blind, randomized, placebo-controlled, parallel-group, interventional, phase-III study |          | • Symptomatic HF NYHA II-IV class                                                                                                                                                                                                                                                                                                                                                                                                                                                                                                                                           | Mid-range (40-49%) or preserved (≥50%) | Spironolactone (25-50 mg) vs. placebo                                                                                                                                                                                                 | Composite of recurrent HHF and CV death                   | Ongoing                          |

|                                |                                    |                                                                                                                                                                                                                               |      |                            |                                         |         |
|--------------------------------|------------------------------------|-------------------------------------------------------------------------------------------------------------------------------------------------------------------------------------------------------------------------------|------|----------------------------|-----------------------------------------|---------|
| SPIRRIT-HFpEF<br>(NCT02901184) | Registry-randomized clinical trial | <ul style="list-style-type: none"><li>• Stable HF NYHA Class II-IV</li><li>• NT-proBNP &gt;300 ng/L (or BNP &gt;100 pg/mL) in sinus rhythm</li></ul>                                                                          | ≥40% | Spironolactone vs. placebo | Primary outcome CV death or time to HHF | Ongoing |
|                                |                                    |                                                                                                                                                                                                                               |      |                            |                                         |         |
|                                |                                    | <ul style="list-style-type: none"><li>• NT-proBNP &gt;750 ng/L (or BNP &gt;250 pg/mL) in AF</li><li>• NT-proBNP &gt;1200 ng/L (or BNP &gt;400 pg/mL) within the last 12 months, even if most recent value is lower.</li></ul> |      |                            |                                         |         |
|                                |                                    |                                                                                                                                                                                                                               |      |                            |                                         |         |
|                                |                                    | <ul style="list-style-type: none"><li>• Regular use of LD</li></ul>                                                                                                                                                           |      |                            |                                         |         |

CV: cardiovascular; HHF heart failure hospitalizations; NYHA: New York Heart Association; HR: hazard ratio; CI: confidence interval; LAD: left atrial diameter; LAA: left atrial area; LAVI:left atrial volume index; LVMI: left ventricular mass index; NT-proBNP: n-terminal prohormone B-type natriuretic peptide; BNP: B-type natriuretic peptide;; AF: atrial fibrillation; CKD: chronic kidney disease; UACR: urine albumin-to-creatinine ratio; and LD: loop diuretics.

**Table S2.** RCTs on SGLT2i use in HFpEF.

|                                         | N° pt  | DM                                           | Follow-Up (Median) | Age         | Sex (% Female) | LVEF*                         | Treatment              | Primary Outcome                                                        | HR; (95% CI)                                                                          |
|-----------------------------------------|--------|----------------------------------------------|--------------------|-------------|----------------|-------------------------------|------------------------|------------------------------------------------------------------------|---------------------------------------------------------------------------------------|
| EMPEROR-PRESERVED [51]<br>NCT03057951   | 5988   | with or without DM                           | 26.2 months        | 71.8        | 44.6%          | 54%                           | Empagliflozin          | CV deaths HHF                                                          | 0.79; (0.69–0.90) <i>p</i> <0.001                                                     |
| PRESERVED-HF [133]<br>NCT03030235       | 324    | with or without DM                           | 3.0 years          | 70.0        | 57%            | 60%                           | Dapagliflozin          | KCCQ-CS at 12 weeks after treatment initiation                         | 68.6; (66.2, 71.0) <i>p</i> 0.001                                                     |
| DELIVER [52]<br>NCT03619213.            | 6263   |                                              | 2.3 year           | 71.8        | 43.6%          | 54%                           | Dapagliflozin          | Composite of worsening HF or CV death*                                 | 0.82; (0.73–0.92) <i>p</i> <0.001                                                     |
| SOLOIST-WHF [134]<br>NCT03521934.       | 1222   | with DM and recent HF worsening              | 9.0 months         | 70          | 32.6%          | 20% with LVEF >50%            | Sotagliflozin          | Total number of CV deaths HHF HF urgent visits                         | 0.67 (0.52–0.85); <i>p</i> <0.001                                                     |
| EMPERIAL-PRESERVED<br>NCT03448406 [137] | 315    | with or without DM                           | 12 weeks           | 73.5        | 43.2           | 53.1                          | Empagliflozin          | -6MWT change in week 12                                                | <i>p</i> =0.37                                                                        |
| CHIEF-HF<br>NCT04252287 [138]           | 476    | with or without DM                           | 2 weeks            | 63.4 ± 13.3 | 45%            | 50%(60%)                      | Canagliflozin (100 mg) | Change in KCCQ TSS at 12 weeks                                         | 100 mg of canagliflozin or placebo                                                    |
| VERTIS CV<br>NCT01986881 [139]          | 8246   | with DM                                      | 3.5 years          | 64.4        | 30%            | 1007 patients with LVEF >45%) | Ertugliflozin          | CV death, nonfatal MI, nonfatal stroke                                 | 0.97 (0.85–1.11) <i>p</i> <0.001                                                      |
| SCORED [134].                           | 10,584 | with DM, CKD**                               | 16 months          | 72          | 40%            | >45%                          | Sotagliflozin          | risk of the composite of CV deaths, HHF                                | 0.95 (0.86–1.05)                                                                      |
| DECLARED-TIMI-58 [140]                  | 17,160 | with DM and CVD or multiple CVD risk factors | 4.2 years          | 72          | 37%            | 1316 patients with 55%        | dapagliflozin          | Primary safety outcome Non-inferiority to placebo with respect to MACE | Primary safety outcome: <i>p</i> <0.001 for noninferiority Primary efficacy outcomes: |

|                                       |     |                                                                                               |                  |          |    |      |                             |                                     |                                                                                                                                                                                                                                                                                                                                            |                                                                                                                                                                          |
|---------------------------------------|-----|-----------------------------------------------------------------------------------------------|------------------|----------|----|------|-----------------------------|-------------------------------------|--------------------------------------------------------------------------------------------------------------------------------------------------------------------------------------------------------------------------------------------------------------------------------------------------------------------------------------------|--------------------------------------------------------------------------------------------------------------------------------------------------------------------------|
|                                       |     |                                                                                               |                  |          |    |      |                             |                                     | <ul style="list-style-type: none"> <li>Primary efficacy outcomes: <ul style="list-style-type: none"> <li>MACE: CV death, MI, or ischemic stroke</li> <li>CV death or HHF</li> </ul> </li> <li>Difference in change in BNP from baseline to 12 weeks between the patients receiving luseogliflozin and those receiving voglibose</li> </ul> | <ul style="list-style-type: none"> <li><b>MACE</b> 0.93; 0.84–1.03; <math>p=0.17</math></li> <li><b>CV death or HHF</b> 0.83; 0.73–0.95; <math>p=0.005</math></li> </ul> |
| <b>MUSCAT-HF</b><br>NCT03315143 [141] | 160 | <ul style="list-style-type: none"> <li>Luseogliflozin (82)</li> <li>Voglibose (83)</li> </ul> | DM and HF        | 12 weeks |    | >45% | Luseogliflozin or voglibose |                                     |                                                                                                                                                                                                                                                                                                                                            |                                                                                                                                                                          |
| <b>CANDLE</b><br>NCT03315143 [142]    | 253 |                                                                                               | DM and stable HF | 24 weeks | 68 | 25%  | ≥50% (71%)                  | canagliflozin 100 mg or glimepiride | Percentage change (post/pre –1) from baseline in NT-proBNP at week 24.                                                                                                                                                                                                                                                                     | 0.48; –0.13–1.59, $p=0.226$                                                                                                                                              |

LVEF: left ventricle ejection fraction; DM: diabetes mellitus; CHD: chronic kidney disease; HHF: heart failure hospitalizations; MACE: major adverse cardiovascular events; BNP: brain natriuretic peptide; and KCCQ TSS: Kansas City Cardiomyopathy Questionnaire Total Symptom Score.
